# Supplementary material for: Bifunctional thioacetamide-mediated synthesis of few-layered MoOSx nanosheet-modified CdS hollow spheres for efficient photocatalytic H2 production
Source: Royal Society of Chemistry journal article supplement (doi:10.1039/d2cy01315k), 2022-01-01
Supplement: d2cy01315k1.pdf [file d2cy01315k1.pdf]

## Supporting Information

### **Bifunctional thioacetamide-mediated synthesis of few-layered MoOS<sub>x</sub> nanosheet-modified CdS hollowspheres for efficient photocatalytic H<sub>2</sub> production**

Siqin Tao,<sup>a</sup> Wei Zhong,<sup>a</sup> Yuxiao Chen,<sup>a</sup> Feng Chen,<sup>a</sup> Ping Wang,<sup>a</sup> and Huogen Yu<sup>\*ab</sup>

<sup>a</sup> *School of Chemistry, Chemical Engineering and Life Sciences, and State Key Laboratory of Silicate Materials for Architectures, Wuhan University of Technology, Wuhan 430070, PR China*

<sup>b</sup> *Laboratory of Solar Fuel, Faculty of Materials Science and Chemistry, China University of Geosciences, Wuhan, 430070, PR China*

\*Corresponding author. Tel: +86-27-87756662; Fax: +86-27-87879468;

E-mail: huogenyu@163.com

## SI-1 Characterization

Fourier transform infrared spectra (FTIR) and Raman data were recorded utilizing Nexus FTIR Spectrophotometer and an INVIA spectrophotometer, respectively. Transmission electron microscopy (TEM) and elemental mapping images were applied on JEM-2100F, with a high angle annular dark field imaging (HAADF-STEM) and energy-dispersive X-ray spectrometer (Oxford Instruments, Britain). The morphology and structure features were analyzed by field emission scanning electron microscopy (FESEM, JSM-7500F) and X-ray diffraction (XRD, Rigaku, Japan) patterns. A KRATOA XSAM800 system was applied to acquire X-ray photoelectron spectroscopy (XPS) spectra and an ESCALAB 10 electron spectrometer was used to collect *in situ* X-ray photoelectron spectroscopy (XPS) spectra. For optical properties analysis, UV-vis diffuse reflectance spectra were utilized on a UV-2450 Shimadzu spectrophotometer. The time-resolved transient photoluminescence (TRPL) spectra were implemented on FLS920 fluorescence spectrophotometer.

## SI-2 Photoelectrochemical experiments

Photoelectrochemical measurements were obtained on a CHI660E electrochemical workstation with a three-electrode cell within a nitrogen atmosphere in Na<sub>2</sub>SO<sub>4</sub> (0.5 M) solution. The test equipment includes a Pt sheet as the counter electrode, an Ag/AgCl electrode as the reference electrode, and sample-loaded FTO glass as the working electrode. The sample-loaded FTO was prepared as follows: 10 mg of powder was dispersed into 2.5 mL of ethanol, and then, 2.5 mL of 1 wt % Nafion ethanol mixing solution was added, and finally the above mixture was uniformly mixed by ultrasonic for 30 min. The obtained FTO glass was dried at 50 °C for 12 h. During *i-t* curve measurements, a 420 nm, 3 W LED was used as the light source, and the open-circuit voltage (0.5 V) was used as the applied bias. For the EIS measurements, the frequency was applied in a range of 10<sup>-3</sup> to 10<sup>6</sup> Hz with an amplitude of 0.01 V. In the linear sweep voltammogram tests, the applied bias was used from -1.2 to -1.7 V.

### SI-3 DFT computational methods

All the first principle calculations were carried out by using the Vienna Ab initio Simulation Package (VASP). Generalized gradient approximation (GGA) with Perdew-Burke-Ernzerhof (PBE) functional was selected to describe the exchange-correlation interaction. The energy cutoff and Monkhorst-Pack k-point meshes were set as 450 eV and  $3 \times 3 \times 1$ , respectively. The convergence threshold was set as  $10^{-4}$  eV for energy and  $0.01 \text{ eV \AA}^{-1}$  for force. To eliminate interactions between periodic structures, a vacuum of 20 Å was added. In this work, the typical (002) and (100) surfaces were selected for  $\text{MoOS}_x$  and CdS calculations, respectively. The Gibbs free energy of H atom adsorption ( $\Delta G_{\text{H}^*}$ ) was defined as following equation:

$$\Delta G_{\text{H}} = \Delta E_{\text{H}} + \Delta E_{\text{ZPE}} - T\Delta S_{\text{H}}$$

where  $\Delta E_{\text{H}}$ ,  $\Delta E_{\text{ZPE}}$ ,  $T\Delta S_{\text{H}}$  are the differential hydrogen  $\Delta E_{\text{H}}$  adsorption energy, the change in zero-point energy and entropy between the adsorbed hydrogen and molecular hydrogen in gas phase, respectively, and T is the temperature.

**SI-4** The AQE calculation.

The apparent quantum efficiency (AQE) was evaluated according to the following equation:

$$\text{AQE [\%]} = \frac{\text{number of evolved H}_2 \text{ molecules} \times 2}{\text{number of incident photons}} \times 100\%$$

The average power of the light source (four 3-W 420±10 nm) was 27.3 mW/cm<sup>2</sup>.

Thus, the AQE of the acquired few-layered MoOS<sub>x</sub>/CdS(1 wt%) hollowsphere photocatalyst could be calculated to be 7.2 %.

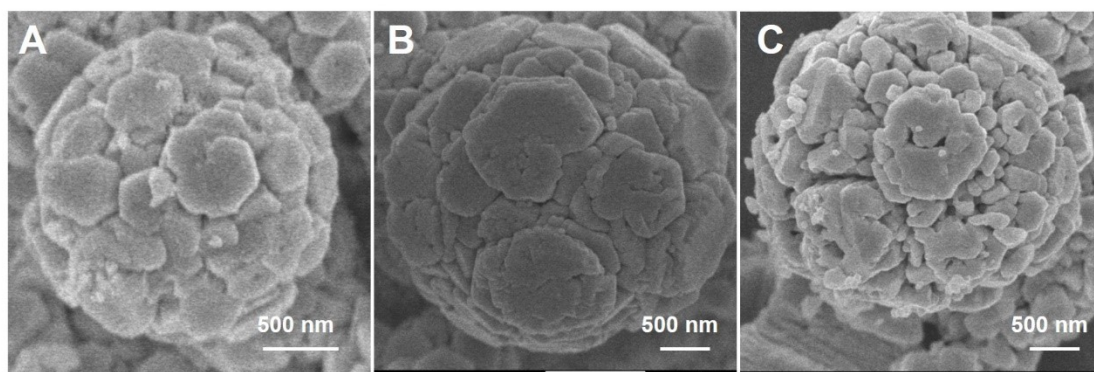

**Fig. S1** FESEM images with different reaction time: (A) 1 h, (B) 8 h, and (C) 12 h.

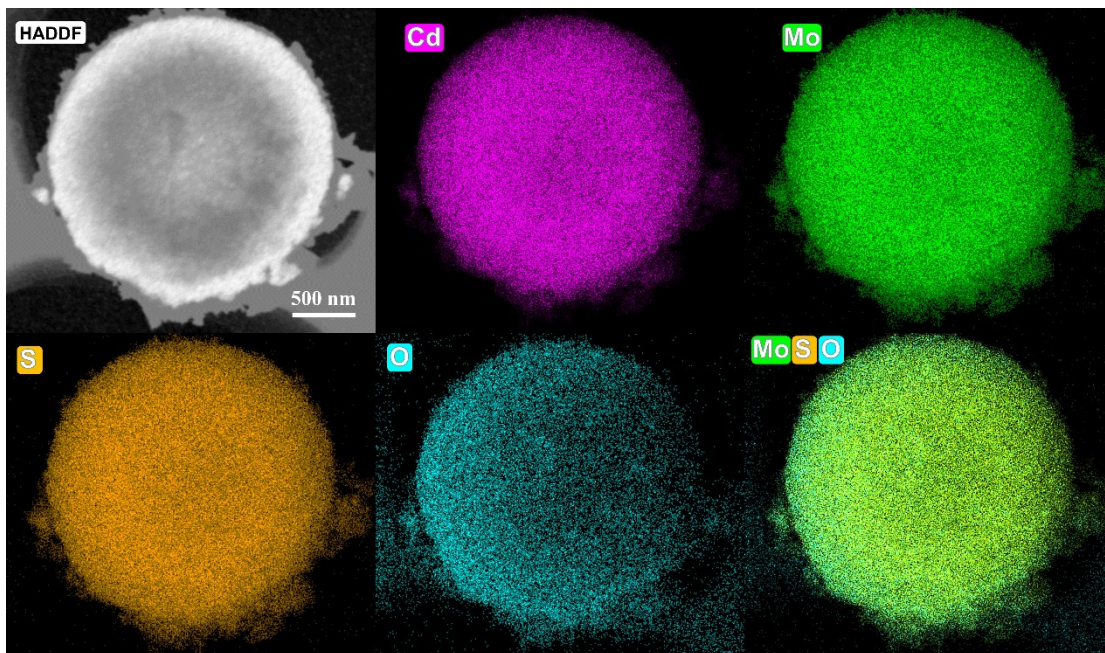

**Fig. S2** HAADF-STEM and EDS images of few-layered MoOS<sub>x</sub>/CdS hollowsphere photocatalyst.

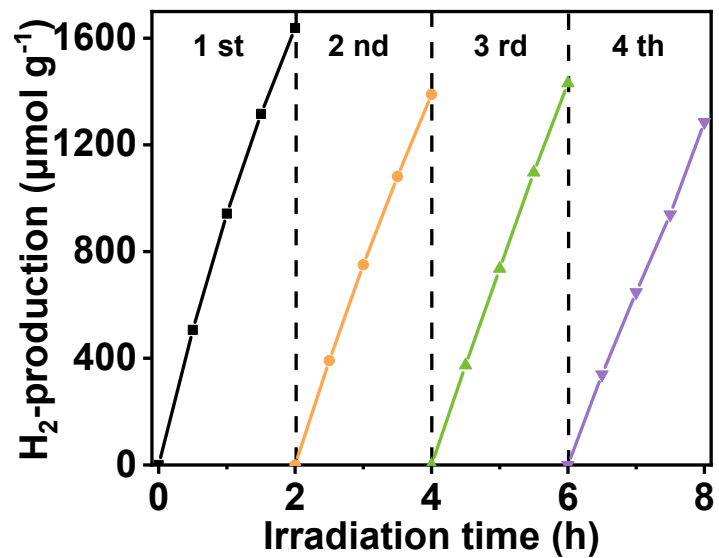

**Fig. S3** Cycling photocatalytic H<sub>2</sub>-evolution tests of the MoOS<sub>x</sub>/CdS(1 wt%) photocatalyst.



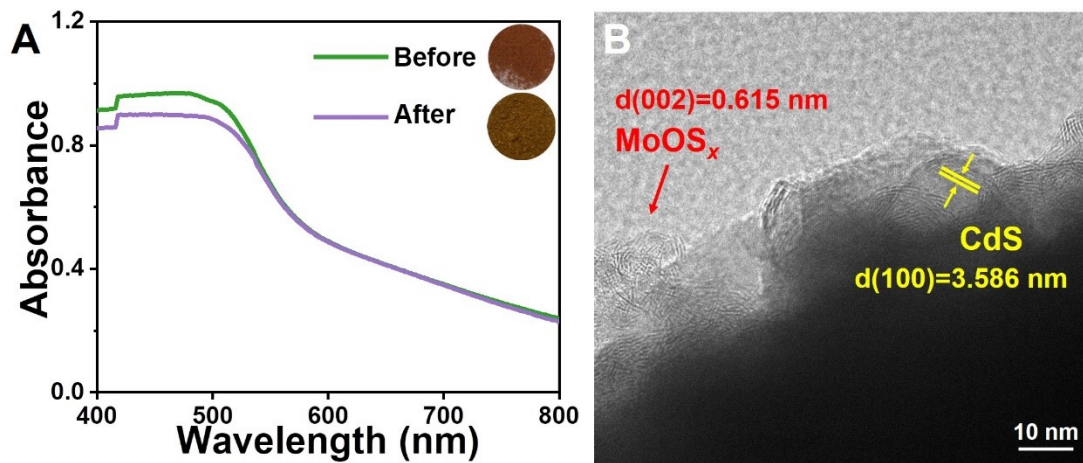

**Fig. S4** (A) UV-vis absorption spectra of MoOS<sub>x</sub>/CdS(1 wt%) photocatalyst before and after cycling experiments. (B) The corresponding TEM image of MoOS<sub>x</sub>/CdS(1 wt%) photocatalyst after cycling experiments.

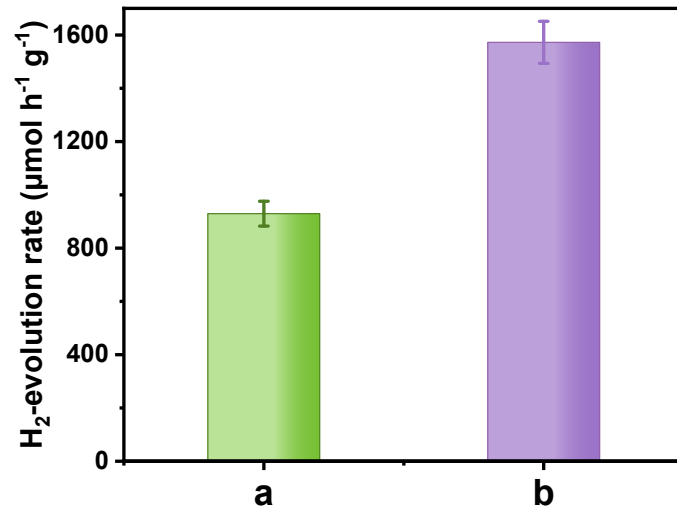

**Fig. S5** The photocatalytic H<sub>2</sub>-evolution rates of the (a) MoOS<sub>x</sub>/CdS(1 wt%) and (b) Pt/CdS(1 wt%) photocatalysts.

**Table S1.** Comparison of the photocatalytic H<sub>2</sub>-evolution rates for CdS based photocatalysts.

| Photocatalysts                                                        | Light source        | Sacrificial agent                                                | Activity<br>( $\mu\text{mol}\cdot\text{h}^{-1}\text{g}^{-1}$ ) | Ref.      |
|-----------------------------------------------------------------------|---------------------|------------------------------------------------------------------|----------------------------------------------------------------|-----------|
| MoOS <sub>x</sub> /CdS                                                | 3-W 420 nm LED lamp | 10 vol% lactic acid                                              | 929.4                                                          | This work |
| NiS/CdS                                                               | 300 W Xe lamp       | 10 vol% lactic acid                                              | 542.0                                                          | [1]       |
| CdS/g-C <sub>3</sub> N <sub>4</sub> /ZnFe <sub>2</sub> O <sub>4</sub> | 300 W Xe lamp       | 0.5 M Na <sub>2</sub> SO <sub>3</sub> -Na <sub>2</sub> S         | 135.2                                                          | [2]       |
| CdS@carbon dots                                                       | 300 W Xe arc lamp   | 0.35 M Na <sub>2</sub> SO <sub>3</sub> -0.25 M Na <sub>2</sub> S | 344.0                                                          | [3]       |
| CdS/VS <sub>2</sub>                                                   | 300 W Xe lamp       | 0.25 M Na <sub>2</sub> SO <sub>3</sub> -0.35 M Na <sub>2</sub> S | 779.8                                                          | [4]       |
| Ag <sub>2</sub> S/CdS                                                 | 300 W Xe lamp       | 2 vol% lactic acid                                               | 777.3                                                          | [5]       |
| Ti <sub>3</sub> C <sub>2</sub> @CdS                                   | 300 W Xe lamp       | 20 vol% methanol                                                 | 88.2                                                           | [6]       |
| NaYF <sub>4</sub> :Yb,Er/CdS                                          | 300 W Xe lamp       | Na <sub>2</sub> SO <sub>3</sub> -Na <sub>2</sub> S               | 2539                                                           | [7]       |
| NiP <sub>x</sub> /MoS <sub>2</sub> /NiS/CdS                           | 300 W Xe lamp       | 5 g/L glucose                                                    | 297.0                                                          | [8]       |
| CdS/NiO                                                               | 300 W Xe lamp       | 0.25 M Na <sub>2</sub> SO <sub>3</sub> -0.35 M Na <sub>2</sub> S | 1770                                                           | [9]       |
| CuO/CdS/CoWO <sub>4</sub>                                             | 300 W Xe lamp       | 0.5 M Na <sub>2</sub> SO <sub>3</sub> -Na <sub>2</sub> S         | 457.9                                                          | [10]      |

## References

- 1 Y. Yang, Q. Meng, X. Jiang, S. Meng, X. Zheng, S. Zhang, X. Fu and S. Chen, *ACS Appl. Energy Mater.*, 2020, **3**, 7736-7745.
- 2 R. Belakehal, K. Atacan, N. Güy, A. Megriche and M. Özacar, *Appl. Surf. Sci.*, 2022, **602**, 154315.
- 3 S. Qiu, Y. Shen, G. Wei, S. Yao, W. Xi, M. Shu, R. Si, M. Zhang, J. Zhu and C. An, *Appl. Catal. B Environ.*, 2019, **259**, 118036.
- 4 M. Niu, L. Cao, L. Feng, D. He, X. Li, Q. Chen, C. Fu and J. Huang,

- ChemNanoMat*, 2022, **8**, e202200163.
- 5 C. Lu, S. Du, Y. Zhao, Q. Wang, K. Ren, C. Li and W. Dou, *RSC Adv.*, 2021, **11**, 28211-28222.
  - 6 Y. Wang, X. Wang, Y. Ji, R. Bian, J. Li, X. Zhang, J. Tian, Q. Yang and F. Shi, *Int. J. Hydrogen Energy*, 2022, **47**, 22045-22053.
  - 7 H. Zhu, Y. Yang, Y. Kang, P. Niu, X. Kang, Z. Yang, H. Ye and G. Liu, *J. Mater. Sci. Technol.*, 2022, **102**, 1-7.
  - 8 X. Zheng, X. Wang, J. Liu, X. Fu, Y. Yang, H. Han, Y. Fan, S. Zhang, S. Meng and S. Chen, *J. Am. Ceram. Soc.*, 2021, **104**, 5307-5316.
  - 9 C. Deng, F. Ye, T. Wang, X. Ling, L. Peng, H. Yu, K. Ding, H. Hu, Q. Dong, H. Le and Y. Han, *Nano Res.*, 2021, **15**, 2003-2012.
  - 10 N. Güy, K. Atacan and M. Özacar, *Renewable Energy*, 2022, **195**, 107-120.
